# Supplementary material for: Cat and/or Dog Ownership, Cardiovascular Disease, and Obesity: A Systematic Review
Source: MDPI journal article supplement (doi:10.3390/vetsci8120333), 2021-12-17
Supplement: s1 [file s1]

**Supplementary Table S1.** Quality and Bias Assessment Parameters for Included Studies.

| Assessment Parameter              | Score & Rating                                                                                                                                                                                                                                                                                                                                                                                                                                                                                                                                                                                        |
|-----------------------------------|-------------------------------------------------------------------------------------------------------------------------------------------------------------------------------------------------------------------------------------------------------------------------------------------------------------------------------------------------------------------------------------------------------------------------------------------------------------------------------------------------------------------------------------------------------------------------------------------------------|
| Degree of Pertinence (Fitness)    | <p>3: The study focuses on, and directly addresses, one or more of this review's focal chronic disease (i.e., CVD, T2D, or obesity), and clearly defines pet ownership. It further identifies participants and/or groups using established biomarkers or components of CVD, T2D, or obesity.</p> <p>2: The study focuses on, and directly addresses, one or more of this review's focal chronic disease (i.e., CVD, T2D, or obesity), and clearly defines pet ownership.</p> <p>1: The study directly addresses one or more of this review's focal chronic diseases (i.e., CVD, T2D, or obesity).</p> |
| Quality of outcomes               | <p>3: The study's outcome measures appropriately identify and describe variables of interests; outcomes are clearly defined and were objectively obtained.</p> <p>2: The study's outcome measures appropriately identify and describe variables of interests; either outcomes are not clearly defined or were subjectively obtained (e.g., self-report).</p> <p>1: The study's outcome measures appropriately identify and describe variables of interests; the outcomes are not clearly defined and/or were subjectively obtained (e.g., self-report).</p>                                           |
| Instrumentation Validity          | <p>3: Study uses a previously validated instrument for data collection or study sources data from a previously conducted survey that used a validated survey instrument.</p> <p>2: Study uses elements from, or adapts, a validated instrument for data collection.</p> <p>1: Study uses an unvalidated instrument for data collection, or the author does not report whether or not the instrument has been validated.</p>                                                                                                                                                                           |
| Degree of Generalizability        | <p>3: Generalizable to the national population.</p> <p>2: Limited generalizability (i.e., generalizable to localized populations and/or population segments).</p> <p>1: Not generalizable.</p>                                                                                                                                                                                                                                                                                                                                                                                                        |
| Summary score (sum of all scores) | <p>12: High quality</p> <p>8: Medium quality</p> <p>4: Lesser quality</p>                                                                                                                                                                                                                                                                                                                                                                                                                                                                                                                             |

**Supplementary Table S2.** Studies (n=14) that Met All Inclusion Criteria.

| Study                               | Purpose                                                                                                                                                                   | Description                                                                                                                                                                                                                                                                                                                                                   | Measures                                                                                                                                                                                                                                                                                                                                                                                                                                                                                                         | Outcomes                                                                                                                                                                                                                                  |
|-------------------------------------|---------------------------------------------------------------------------------------------------------------------------------------------------------------------------|---------------------------------------------------------------------------------------------------------------------------------------------------------------------------------------------------------------------------------------------------------------------------------------------------------------------------------------------------------------|------------------------------------------------------------------------------------------------------------------------------------------------------------------------------------------------------------------------------------------------------------------------------------------------------------------------------------------------------------------------------------------------------------------------------------------------------------------------------------------------------------------|-------------------------------------------------------------------------------------------------------------------------------------------------------------------------------------------------------------------------------------------|
| <b>Cardiovascular Disease (CVD)</b> |                                                                                                                                                                           |                                                                                                                                                                                                                                                                                                                                                               |                                                                                                                                                                                                                                                                                                                                                                                                                                                                                                                  |                                                                                                                                                                                                                                           |
| Chowdhury et al., 2017 [20]         | Assess the association of pet ownership, all-cause mortality, and cardiovascular mortality over a long-term follow-up (~11 years) among elderly hypertensive participants | <p>Country<br/>Australia: 5 states (family practice)</p> <p>Study design<br/>comparative outcome trial (subsample of Second Australian National Blood Pressure)</p> <p>Study sample<br/>65-84 years old with treated hypertension<br/>N=4,039 (never owners=549, current owners=1,456, previous owners=2,034)</p> <p>Time period<br/>1995-1997, mid-2000s</p> | <p>Independent variable<br/>pet-ownership: cat, dog, other</p> <p>Dependent variable<br/>all-cause mortality, CVD mortality</p> <p>CVD measures<br/>BMI <sup>1</sup>, SBP <sup>2</sup>, DBP <sup>3</sup>, total cholesterol, HDL <sup>4</sup>, LDL <sup>5</sup>, eGFR <sup>6</sup>, PA <sup>7</sup>, ACE <sup>8</sup></p> <p>Pet ownership<br/>5-item instrument: currently owned or had ever owned, type &amp; number of pets, lived inside or outside home, walked dog (daily, most days, rarely or never)</p> | <p>All-cause mortality<br/>16% reduction in previous owners, 11% reduction in current owners vs never-owners, p=.06</p> <p>CVD mortality<br/>22% reduction in previous owners, 26% reduction in current owners vs never-owners, p=.05</p> |

|                                                                                           |                                                                                                        |                                                                                                      |                                                                                                                                                                                            |                                                                                                               |
|-------------------------------------------------------------------------------------------|--------------------------------------------------------------------------------------------------------|------------------------------------------------------------------------------------------------------|--------------------------------------------------------------------------------------------------------------------------------------------------------------------------------------------|---------------------------------------------------------------------------------------------------------------|
| Ding et al., 2018 [21]                                                                    | Examine the association of dog ownership with all-cause mortality and CVD mortality                    | Country<br>England                                                                                   | Independent variable<br>pet-ownership: dog                                                                                                                                                 | All-cause mortality<br>hazard ratio=1.03, 95% confidence interval (CI)=0.98-1.09 (no significant association) |
| Dog ownership and mortality in England: a pooled analysis of six population-based cohorts |                                                                                                        | Study design<br>multistage stratified probability design (Health Surveys for England)                | Dependent variable<br>all-cause mortality, CVD mortality                                                                                                                                   | CVD mortality<br>hazard ratio=1.07, 95% CI=0.96-1.18 (no significant association)                             |
|                                                                                           |                                                                                                        | Study sample<br>≥16 years old<br>N=59,352 (dog owners=17,071, non-owners=42,281)                     | CVD measures<br>diabetes mellitus, smoking status, alcohol consumption                                                                                                                     |                                                                                                               |
|                                                                                           |                                                                                                        | Time period<br>1995, 1996, 1997, 2001, 2002, 2004                                                    | Pet ownership<br>head of household asked: "Do you keep any household pets inside your house/flat?", type of pet                                                                            |                                                                                                               |
| Krittanawong et al., 2020 [22]                                                            | Assess the association between pet ownership (dog or cat) and CVD health in a heterogeneous population | Country<br>USA                                                                                       | Independent variable<br>pet-ownership: cat, dog                                                                                                                                            | CAD <sup>9</sup><br>either dog or cat: odds ratio (OR)=0.97 (95% CI=0.72-1.29, p=0.82)                        |
| Pet ownership and cardiovascular health in the U.S. general population                    |                                                                                                        | Study design<br>longitudinal prospective (National Health and Nutrition Examination Survey [NHANES]) | Dependent variable<br>CAD <sup>9</sup> , heart failure, diabetes mellitus, stroke systemic hypertension                                                                                    | Heart failure<br>either dog or cat: OR=1.05 (95% CI=0.77-1.43, p=0.73)                                        |
|                                                                                           |                                                                                                        | Study sample<br>N=10,905 (dog owners=4,577, cat owners=6,328)                                        | CVD measures<br>SBP <sup>2</sup> , DBP <sup>3</sup> , total cholesterol, HDL <sup>4</sup> , LDL <sup>5</sup> , TG <sup>10</sup> , hyperlipidemia, Framingham risk score, cigarette smoking | Diabetes mellitus<br>either dog or cat: OR=0.87 (95% CI=0.74-1.03, p=0.08)                                    |
|                                                                                           |                                                                                                        | Time period<br>1999-2016                                                                             | Pet ownership<br>4 items: "Dog in house now. Dog in house, last 12 months. Cat in house now. Cat in house, last 12 months."                                                                | Stroke<br>either dog or cat: OR=0.83 (95% CI=0.61-1.12, p=0.22)                                               |
|                                                                                           |                                                                                                        |                                                                                                      |                                                                                                                                                                                            | Systemic hypertension<br>dog & cat: OR=0.69 (95% CI=0.54-0.89, p=0.01)                                        |

|                                                                                                   |                                                                                                                                                                              |                                                                                                                                                          |                                                                                                                                                                |                                                                                                                                                         |
|---------------------------------------------------------------------------------------------------|------------------------------------------------------------------------------------------------------------------------------------------------------------------------------|----------------------------------------------------------------------------------------------------------------------------------------------------------|----------------------------------------------------------------------------------------------------------------------------------------------------------------|---------------------------------------------------------------------------------------------------------------------------------------------------------|
| Mubanga et al., 2017 [23]                                                                         | Assess the association of dog ownership with CVD and mortality in a registered-based prospective nation-wide cohort with up to 12 years of follow-up                         | Country<br>Sweden                                                                                                                                        | Independent variable<br>pet-ownership: dog                                                                                                                     | All-cause mortality (RTP)<br>hazard ratio=0.80, 95% CI=0.79-0.82                                                                                        |
| Dog ownership and the risk of cardiovascular disease and death - a nationwide cohort study        |                                                                                                                                                                              | Study design<br>Longitudinal prospective (Register of the Total Population [RTP], Swedish Twin Registry [STR]: Screening Across the Lifespan Twin study) | Dependent variable<br>all-cause mortality, acute MI <sup>11</sup> , heart failure, ischemic stroke, hemorrhagic stroke, composite CVD incidents, CVD mortality | Acute MI <sup>11</sup> mortality (RTP)<br>hazard ratio=0.97, 95% CI=0.95-0.99                                                                           |
|                                                                                                   |                                                                                                                                                                              | Study sample<br>40-80 years<br>RTP: N=3,432,153<br>STR: N= 34,202                                                                                        | CVD measures<br>N/A <sup>12</sup>                                                                                                                              | CVD mortality (RTP)<br>hazard ratio=0.77, 95% CI=0.73-0.80                                                                                              |
|                                                                                                   |                                                                                                                                                                              | Time period<br>RTP: 1/1/2001-12/31/2012<br>STR: 1/1/2001-12/31/2014                                                                                      | Pet ownership<br>registered or having a partner registered as a dog owner in either of two national dog registers                                              |                                                                                                                                                         |
| Mubanga et al., 2019 [24]                                                                         | Assess the association of dog ownership with survival and recurrent events after a major cardiovascular event in a large prospective, nationwide register-based cohort study | Country<br>Sweden                                                                                                                                        | Independent variable<br>pet-ownership: dog                                                                                                                     | Acute MI <sup>11</sup> mortality<br>living alone: hazard ratio=0.67, 95% CI=0.61-0.75<br>living with partner/child: hazard ratio=0.85, 95% CI=0.80-0.90 |
| Dog ownership and survival after a major cardiovascular event: a register-based prospective study |                                                                                                                                                                              | Study design<br>Longitudinal prospective (Swedish National Patient Register)                                                                             | Dependent variable<br>acute MI <sup>11</sup> , ischemic stroke                                                                                                 |                                                                                                                                                         |
|                                                                                                   |                                                                                                                                                                              | Study sample<br>40-85 years<br>acute MI <sup>11</sup> : n=181,696 (10,287 dog owners)<br>ischemic stroke: n=154,617 (7,344 dog owners)                   | CVD measures<br>use of medication for hypertension, dyslipidemia, diabetes mellitus                                                                            | Ischemic stroke mortality<br>living alone: hazard ratio=0.73, 95% CI=0.66-0.80<br>living with partner/child: hazard ratio=0.88, 95% CI=0.83-0.93        |
|                                                                                                   |                                                                                                                                                                              | Time period<br>1/1/2001-12/31/2012<br>no event 1999-2001                                                                                                 | Pet ownership<br>registered as a dog owner in either of two national dog registers                                                                             |                                                                                                                                                         |

|                                                                                                                       |                                                                                                                                                                                                  |                                                                                                                                                      |                                                                                                                                                                               |                                                                                                                                                                                                                                                               |
|-----------------------------------------------------------------------------------------------------------------------|--------------------------------------------------------------------------------------------------------------------------------------------------------------------------------------------------|------------------------------------------------------------------------------------------------------------------------------------------------------|-------------------------------------------------------------------------------------------------------------------------------------------------------------------------------|---------------------------------------------------------------------------------------------------------------------------------------------------------------------------------------------------------------------------------------------------------------|
| Ogechi et al., 2016 [25]                                                                                              | Examine the association between pet ownership and CVD risk in people without established CVD                                                                                                     | Country<br>USA                                                                                                                                       | Independent variable<br>pet-ownership: cat, dog, other                                                                                                                        | CVD mortality<br>hazard ratio=0.69, 95%, CI=0.45-1.07 among women (weak association – cat ownership)                                                                                                                                                          |
| Pet ownership and the risk of dying from cardiovascular disease among adults without major chronic medical conditions |                                                                                                                                                                                                  | Study design<br>longitudinal prospective (NHANES III)                                                                                                | Dependent variable<br>CVD mortality, acute ischemia, stroke, hypertension                                                                                                     |                                                                                                                                                                                                                                                               |
|                                                                                                                       |                                                                                                                                                                                                  | Study sample<br>≥50 years without chronic disease diagnosis at baseline<br>N=3,964                                                                   | CVD measures<br>PA <sup>7</sup> level, BMI <sup>1</sup> , cigarette smoking, alcohol consumption                                                                              | Stroke mortality<br>hazard ratio=0.54, 95%, CI=0.28-1.01 among women (weak association – cat ownership)                                                                                                                                                       |
|                                                                                                                       |                                                                                                                                                                                                  | Time period<br>1988-1994, 2006                                                                                                                       | Pet ownership<br>2-part questionnaire: “Does a pet live here? If yes, what type of pet is it?”                                                                                |                                                                                                                                                                                                                                                               |
| Parker et al., 2010 [26]                                                                                              | Re-examine findings from previous studies reporting an association between pet ownership and coronary artery disease survival at 12 months in patients hospitalized with acute coronary syndrome | Country<br>Australia: Sydney (large teaching hospital) & surrounding districts                                                                       | Independent variable<br>pet-ownership: cat, dog, bird                                                                                                                         | Univariate analyses<br>pet owners (those who had a household pet at baseline) were more likely to experience an ACS <sup>13</sup> readmission or cardiac-related death over 12 months (22.2%) than non-pet owners, 13.6%, X <sup>2</sup> = 4.7, df=1, p=0.030 |
| Survival following an acute coronary syndrome: a pet theory put to the test                                           |                                                                                                                                                                                                  | Study design<br>longitudinal prospective                                                                                                             | Dependent variable<br>ACS <sup>13</sup> readmission, CVD mortality                                                                                                            | Multivariate analyses<br>no difference in rates of ACS <sup>13</sup> readmission & cardiac death for dog owners (21.9%) vs non-dog-owners (16.3%, X <sup>2</sup> =1.3, df=1, p= 0.249)                                                                        |
|                                                                                                                       |                                                                                                                                                                                                  | Study sample<br>patients hospitalized with ACS <sup>13</sup> , including MI <sup>11</sup> & unstable angina<br>N=424 (12 withdrew/unable to contact) | CVD measures<br>diabetes on admission, CVA <sup>14</sup> or TIA <sup>15</sup> on admission, LVEF <sup>16</sup> , CABG <sup>17</sup> , post-ACS <sup>13</sup> onset depression | difference in rates of ACS readmission & cardiac death for cat owners (27.3%) vs non-cat owners (16.2%) approached significance (X <sup>2</sup> =3.25, df=1, p= 0.071)                                                                                        |
|                                                                                                                       |                                                                                                                                                                                                  | Time period<br>2-year period                                                                                                                         | Pet ownership<br>participants asked if they had a pet in their household, type of pet, whether that pet belonged to them                                                      |                                                                                                                                                                                                                                                               |

|                                                                                                                                                                |                                                                                                                                                       |                                                                                                                          |                                                                                                                                                   |                                                                                                                                      |
|----------------------------------------------------------------------------------------------------------------------------------------------------------------|-------------------------------------------------------------------------------------------------------------------------------------------------------|--------------------------------------------------------------------------------------------------------------------------|---------------------------------------------------------------------------------------------------------------------------------------------------|--------------------------------------------------------------------------------------------------------------------------------------|
| Qureshi et al., 2009 [27]                                                                                                                                      | Determine the effect of pet ownership on fatal cardiovascular events in a nationally representative cohort followed for mean period of 13.4±3.6 years | Country<br>USA                                                                                                           | Independent variable<br>pet-ownership: cat, dog                                                                                                   | MI mortality<br>lower relative risk in previous cat owners than non-cat owners (RR=0.63, 95% CI=0.44-0.88)                           |
| Cat ownership and the risk of fatal cardiovascular diseases. Results from the second National Health and Nutrition Examination Study mortality follow-up study |                                                                                                                                                       | Study design<br>longitudinal prospective (NHANES II follow-up study)                                                     | Dependent variable<br>all-cause mortality, MI mortality, CVD (MI or stroke) mortality, stroke                                                     | CVD mortality<br>increased risk for death due to CVD in non-cat owners than cat owners (RR=0.74, 95% CI=0.55-1.0)                    |
|                                                                                                                                                                |                                                                                                                                                       | Study sample<br>18-74 years old<br>N=4,435                                                                               | CVD measures<br>SBP <sup>2</sup> , serum cholesterol level, BMI <sup>1</sup> , diabetes mellitus, cigarette smoking                               |                                                                                                                                      |
|                                                                                                                                                                |                                                                                                                                                       | Time period<br>1976-1980                                                                                                 | Pet ownership<br>owned or currently owned a cat or dog                                                                                            |                                                                                                                                      |
| Ruzic et al., 2011 [28]                                                                                                                                        | Determine the influence of regular (every day) dog-walking on the physical capacity in patients during the first year after myocardial infarction     | Country<br>Croatia                                                                                                       | Independent variable<br>dog-walking (3x15 minutes/day), walking (30 minutes/day)                                                                  | Physical capacity<br>maximal workload higher in the dog-walking group (72.5±10.75) than in non-dog walking group (67.6±11.6, p<0.05) |
| Regular dog-walking improves physical capacity in elderly patients after myocardial infarction                                                                 |                                                                                                                                                       | Study design<br>longitudinal prospective & controlled                                                                    | Dependent variable<br>physical capacity from Bruce bicycle-ergometry test 1-year after MI <sup>11</sup> (workload, heart rate, BP <sup>18</sup> ) | maximal heart rate and maximal BP not significantly different at the beginning or the end of the intervention for either group       |
|                                                                                                                                                                |                                                                                                                                                       | Study sample<br>older adult patients who were hospitalized for MI <sup>11</sup><br>N=59 males (owners=29, non-owners=30) | CVD measures<br>workload, heart rate, BP <sup>18</sup>                                                                                            |                                                                                                                                      |
|                                                                                                                                                                |                                                                                                                                                       | Time period<br>12 months                                                                                                 | Pet ownership<br>not described                                                                                                                    |                                                                                                                                      |

|                                                                                       |                                                                                                    |                                                                                                                                                                                                                                                                 |                                                                                                                                                                                                                                      |                                                                                                                                                                                                       |
|---------------------------------------------------------------------------------------|----------------------------------------------------------------------------------------------------|-----------------------------------------------------------------------------------------------------------------------------------------------------------------------------------------------------------------------------------------------------------------|--------------------------------------------------------------------------------------------------------------------------------------------------------------------------------------------------------------------------------------|-------------------------------------------------------------------------------------------------------------------------------------------------------------------------------------------------------|
| Xie et al., 2017 [29]                                                                 | Assess the association between pet ownership and CAD <sup>9</sup> patients in a Chinese population | Country<br>China                                                                                                                                                                                                                                                | Independent variable<br>pet-ownership: cat, dog                                                                                                                                                                                      | CAD <sup>9</sup> diagnosis<br>decreased CAD <sup>9</sup> risk among pet owners (OR=0.504; 95% CI=0.310–0.819)                                                                                         |
| Association between pet ownership and coronary artery disease in a Chinese population |                                                                                                    | Study design<br>retrospective                                                                                                                                                                                                                                   | Dependent variable<br>CAD <sup>9</sup> diagnosis (Judkins arteriography technique: stenosis of $\geq 50\%$ in any of major coronary arteries)                                                                                        | reduced CAD <sup>9</sup> risk among dog owners (OR=0.420, 95% CI=0.242–0.728) compared with cat owners (OR=0.738; 95% CI=0.240–2.266) & compared with cat & dog owners (OR=1.052; 95% CI=0.330–3.355) |
|                                                                                       |                                                                                                    | Study sample<br>30-89 years old, suffered from typical or atypical chest pain or abnormal ST segment, T wave changes, & admitted for coronary arteriography<br>N=561 (males=376, females=185, CAD <sup>9</sup> patients=378, non-CAD <sup>9</sup> patients=183) | CVD measures<br>BMI <sup>1</sup> , hypertension, hyperlipidemia, PA <sup>7</sup> , diabetes mellitus, smoking status, drinking status, family history of CAD <sup>9</sup>                                                            | duration of pet ownership is inversely related to CAD <sup>9</sup> risk (p for trend=0.008) & time playing with pets per day (p for trend=0.001)                                                      |
|                                                                                       |                                                                                                    | Time period<br>October 2015-May 2016                                                                                                                                                                                                                            | Pet ownership<br>questionnaire: current cat owner, current dog owner, current cat & dog owner, pet owners asked: <i>"How long have you kept pets? How long do you stay with your pets per day? When did you start to keep pets?"</i> |                                                                                                                                                                                                       |

| Obesity                                                       |                                                                                     |                                                   |                                                                                                                           |                                                                                                                       |
|---------------------------------------------------------------|-------------------------------------------------------------------------------------|---------------------------------------------------|---------------------------------------------------------------------------------------------------------------------------|-----------------------------------------------------------------------------------------------------------------------|
| Heuberger & Wakshlag, 2011 [30]                               | Examine differences in diet and lifestyle between cat and dog owners and their pets | Country<br>USA                                    | Independent variable<br>pet ownership: cat, dog                                                                           | BMI <sup>1</sup><br>overweight (BMI>25 kg/m <sup>2</sup> ) in dog owners was inversely related to age of dog (p<0.01) |
| Characteristics of ageing pets and their owners: dogs v. cats |                                                                                     | Study design<br>cross-sectional                   | Dependent variable<br>PA <sup>7</sup> (exercise), dietary intake, fast food consumption, BMI <sup>1</sup> , health status | younger dog owners with obesity more likely to have a dog with overweight (p<0.04)                                    |
|                                                               |                                                                                     | Study sample<br>>17 years old, pet owner<br>N=473 | Obesity measures<br>BMI, health status (not described), dietary intake (not described), PA <sup>7</sup> (not described)   | Dietary intake<br>fast food consumption by dog owners was inversely related to age of dog (p<0.05)                    |
|                                                               |                                                                                     | Time period<br>not described                      | Pet ownership<br>1-page questionnaire                                                                                     | PA <sup>7</sup><br>exercise by dog owners was inversely related to age of dog (p<0.05)                                |



|                                                           |                                                                                                                                                                  |                                                                                        |                                                                                                                                                                                        |                                                                                                                                             |
|-----------------------------------------------------------|------------------------------------------------------------------------------------------------------------------------------------------------------------------|----------------------------------------------------------------------------------------|----------------------------------------------------------------------------------------------------------------------------------------------------------------------------------------|---------------------------------------------------------------------------------------------------------------------------------------------|
| Kushner et al., 2006<br>[31]                              | Assess the effectiveness<br>of a combined people<br>and pets (PP) weight<br>loss program where<br>both human<br>participants and<br>companion dogs were<br>obese | Country<br>USA                                                                         | Independent variable<br>pet-ownership: dog                                                                                                                                             | BMI <sup>1</sup><br>no significant difference in<br>mean percentage weight loss at<br>12 months (LOCF) for dog<br>owners vs non-owners      |
| The PPET study:<br>People and pets<br>exercising together |                                                                                                                                                                  | Study design<br>Prospective, controlled trial                                          | Dependent variable<br>BMI <sup>1</sup> (weight loss), PA <sup>7</sup> ,<br>social support & exercise<br>readiness scores, social<br>support (qualitative)                              | PA <sup>7</sup><br>dog owners: mean total PA <sup>7</sup><br>increased 39% (2.8 hr/wk at<br>baseline to 3.9 hrs/wk at 12<br>months, p<0.05) |
|                                                           |                                                                                                                                                                  | Study sample<br>21-65 years old with<br>BMI>25kg/m <sup>2</sup> in good health<br>N=92 | Obesity measures<br>BMI <sup>1</sup> , PA <sup>7</sup> (20-30<br>minutes/day) recorded in log,<br>~1400 calories/day recorded in<br>log, social support & exercise<br>readiness scores | non-owners: mean total PA <sup>7</sup><br>increased 87% (1.9 hr/wk at<br>baseline to 3.5 hrs/wk, p<0.05)                                    |
|                                                           |                                                                                                                                                                  | Time period<br>1-year                                                                  | Pet ownership<br>self-reported, confirmed in<br>telephone screen                                                                                                                       | dog owners : two-thirds of<br>total PA <sup>7</sup> spent with as dog-<br>related activity                                                  |
|                                                           |                                                                                                                                                                  |                                                                                        |                                                                                                                                                                                        | Social support & exercise<br>readiness scores<br>No difference between dog<br>owners & non-owners                                           |

|                                                                                             |                                                                                                       |                                                                                                                               |                                                                                                                                        |                                                                                                          |
|---------------------------------------------------------------------------------------------|-------------------------------------------------------------------------------------------------------|-------------------------------------------------------------------------------------------------------------------------------|----------------------------------------------------------------------------------------------------------------------------------------|----------------------------------------------------------------------------------------------------------|
| Niese et al., 2021 [32]                                                                     | Evaluate the potential mutual effects of a weight loss program for both dogs and owners on each other | Country<br>Netherlands                                                                                                        | Independent variable<br>1-day food diary, steps per day, lifestyle knowledge, attitudes, & beliefs, diet & physical activity behaviors | Weight loss<br>2.6% mean weight loss in owner-dog group vs 2.3% mean weight loss in owner only, $p>0.05$ |
| Evaluating the potential benefit of a combined weight loss program in dogs and their owners |                                                                                                       | Study design<br>2 randomized clinical trials (human & dog) each with 2 arms (human clinical trial: owner-dog & owner only)    | Dependent variable<br>weight loss                                                                                                      |                                                                                                          |
|                                                                                             |                                                                                                       | Study sample<br>adult with BMI $\geq$ 25 and able to walk for at least 1 hour/day<br>N=60 (owner-dog: n=29, owner only: n=31) | Obesity measures<br>body weight, fat percentage, waist circumference                                                                   |                                                                                                          |
|                                                                                             |                                                                                                       | Time period<br>8 weeks                                                                                                        | Pet ownership<br>self-reported (not described)                                                                                         |                                                                                                          |

|                                                                                  |                                                                                                     |                                                                                                           |                                                                                              |                                                                                                                   |
|----------------------------------------------------------------------------------|-----------------------------------------------------------------------------------------------------|-----------------------------------------------------------------------------------------------------------|----------------------------------------------------------------------------------------------|-------------------------------------------------------------------------------------------------------------------|
| Stephens et al., 2012 [33]                                                       | Describe baseline characteristics of dog owners' physical health and their levels of pet attachment | Country<br>USA                                                                                            | Independent variable<br>BMI <sup>1</sup> , perceived physical health                         | Perceived health<br>BMI <sup>1</sup> inversely correlated with perceived physical health ( $r=-0.20$ , $p=0.10$ ) |
| Health perceptions and levels of attachment: owners and pets exercising together | Owners & Pets Exercising Together (OPET) trial                                                      | Study design<br>cross-sectional                                                                           | Dependent variable<br>PA <sup>7</sup> , stress, social support, level of attachment with dog | PA <sup>7</sup><br>no correlation between BMI <sup>1</sup> and PA <sup>7</sup>                                    |
|                                                                                  |                                                                                                     | Study sample<br>≥18 years old able to engage in regular PA and owned a dog (at least 2 years old)<br>N=75 | Obesity measures<br>BMI <sup>1</sup> , PA <sup>7</sup> , stress, social support              | perceived physical health correlated with PA <sup>7</sup> ( $r=0.26$ , $p=0.03$ )                                 |
|                                                                                  |                                                                                                     | Time period<br>not described                                                                              | Pet ownership<br>self-reported (not described)                                               | Stress<br>no correlation between BMI <sup>1</sup> and stress                                                      |
|                                                                                  |                                                                                                     |                                                                                                           |                                                                                              | Social support<br>BMI <sup>1</sup> inversely correlated with social support ( $r=-0.27$ , $p=0.02$ )              |
|                                                                                  |                                                                                                     |                                                                                                           |                                                                                              | Attachment with dog<br>BMI <sup>1</sup> correlated with attachment to dog ( $r=0.29$ , $p=0.03$ )                 |

<sup>1</sup> BMI: body mass index, <sup>2</sup> SBP: systolic blood pressure, <sup>3</sup> DBP: diastolic blood pressure, <sup>4</sup> HDL: high-density lipoprotein cholesterol, <sup>5</sup> LDL: low-density lipoprotein cholesterol, <sup>6</sup> eGFR: kidney glomerular filtration rate, <sup>7</sup> PA: physical activity, <sup>8</sup> ACE: angiotensin converting enzyme inhibitor, <sup>9</sup> CAD: coronary artery disease, <sup>10</sup> TG: triglycerides, <sup>11</sup> MI: myocardial infarction, <sup>12</sup> N/A: not applicable, <sup>13</sup> ACS: acute coronary syndrome, <sup>14</sup> CVA: cerebrovascular accident, <sup>15</sup> TIA: transient ischemic attack, <sup>16</sup> LVEF: left ventricular ejection fraction, <sup>17</sup> CABG: coronary artery bypass graft, <sup>18</sup> BP: blood pressure
